# Supplementary material for: Penta-SiCN monolayer as a well-balanced performance anode material for Li-ion batteries
Source: Royal Society of Chemistry journal article supplement (doi:10.1039/d3cp03236a), 2023-01-01
Supplement: d3cp03236a1.pdf [file d3cp03236a1.pdf]

Supporting Information for

## Penta-SiCN monolayer as a well-balanced performance anode material for Li-ion batteries

Xiao-Juan Ye <sup>a</sup>, Xiao-Han Wang <sup>a</sup>, Hong-Bao Cao <sup>a</sup>, Zheng Lu <sup>a</sup>, and Chun-Sheng Liu <sup>b\*</sup>

<sup>a</sup> College of Integrated Circuit Science and Engineering, Nanjing University of Posts and Telecommunications, Nanjing 210023, China

<sup>b</sup> College of Electronic and Optical Engineering, Nanjing University of Posts and Telecommunications, Nanjing 210023, China

Corresponding author: [cslu@njupt.edu.cn](mailto:cslu@njupt.edu.cn)

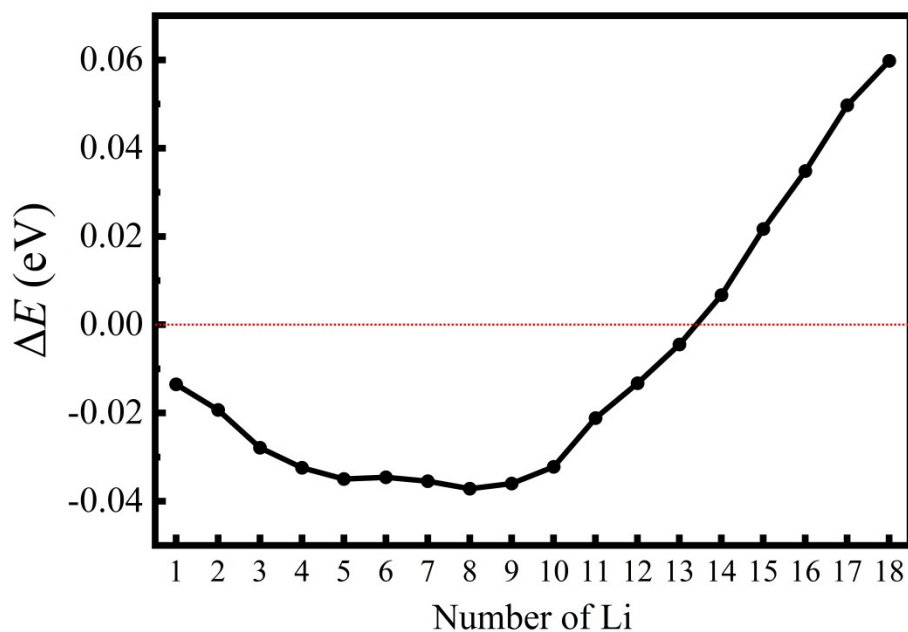

Fig. S1. The energy difference ( $\Delta E = E_{S1} - E_{S3}$ ) between two configurations. The  $E_{S1}$  and  $E_{S3}$  represents the total energy of two configurations with Li adsorbed on S1 and S3 sites of penta-SiCN monolayer, respectively.

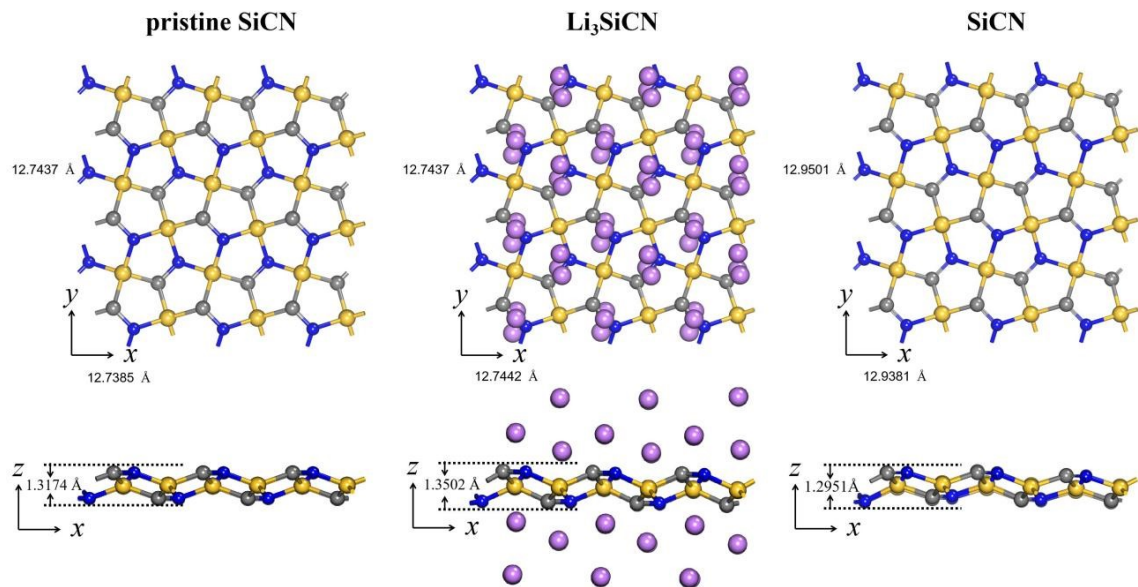

Fig. S2. The optimized configuration of (a) pristine penta-SiCN, (b) penta-SiCN with multi-layers adsorption of Li ( $\text{Li}_3\text{SiCN}$ ), and (c) penta-SiCN after complete removal of Li atoms at the maximal concentration of Li adsorption ( $\text{Li}_3\text{SiCN}$ ).
